# Supplementary material
Source: Springer Nature journal article supplement (https://www.springermedizin.de/resource/supplementary/12889_2009_2317_MOESM1_ESM.pdf/9485360)

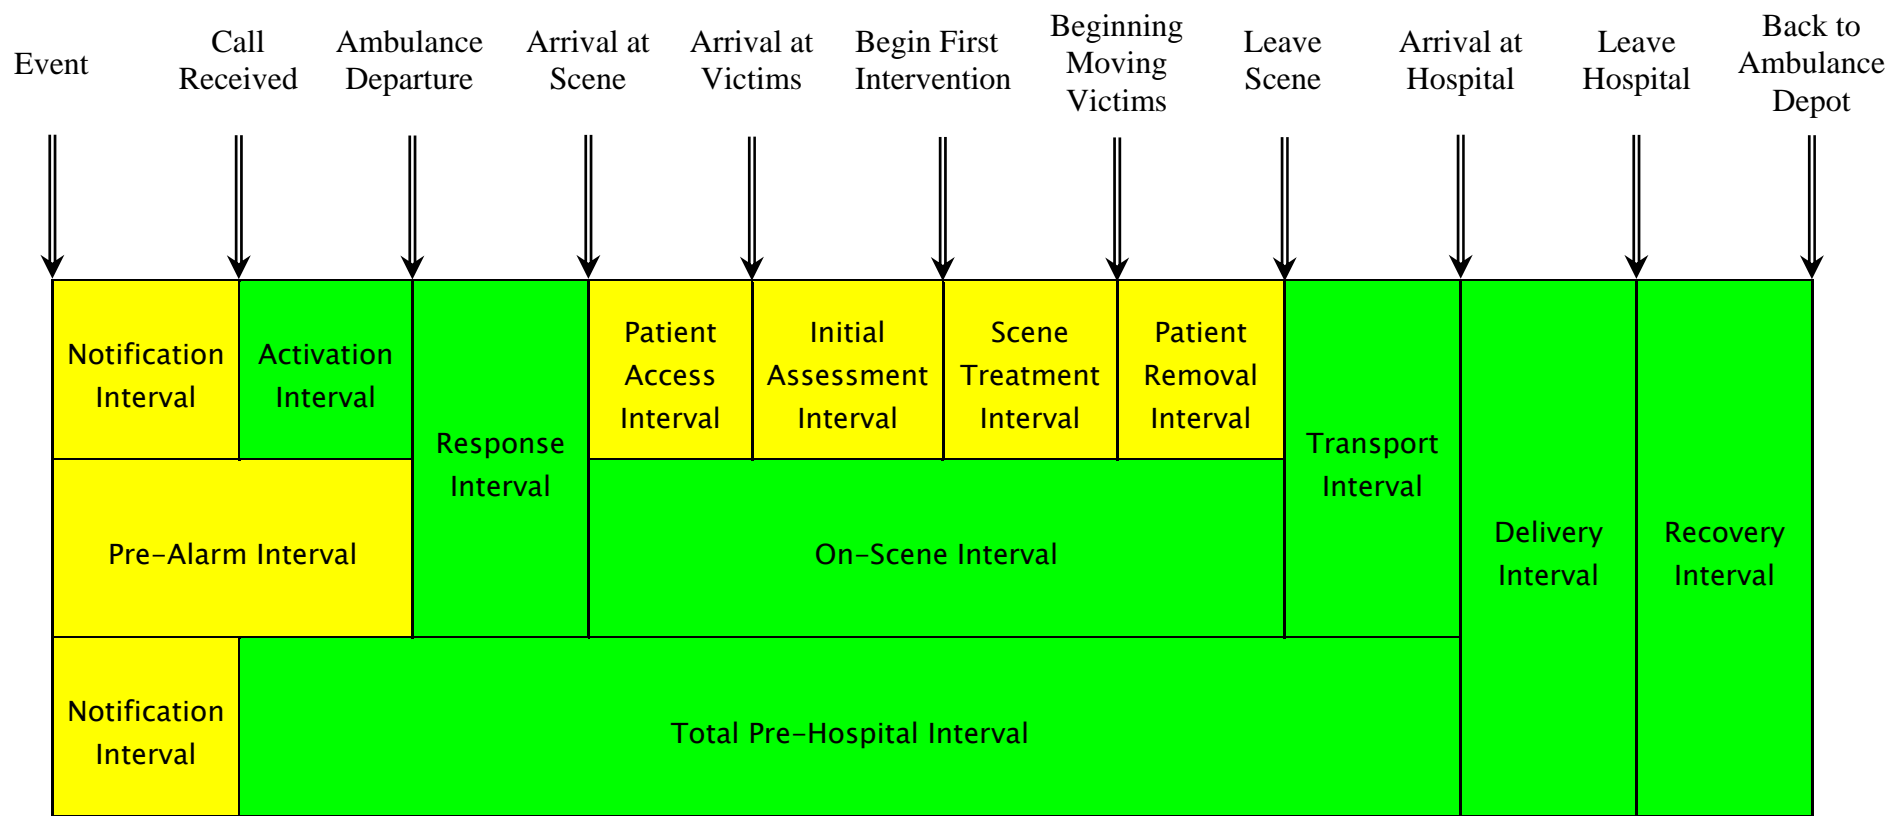

- No available information to be analyzed
- Available information to be analyzed

Supplement: MOESM1 [file 9485360]
